# Supplementary material
Source: PubMed Central journal article supplement (PMC8449319)
Supplement: pnas.2105279118.sapp.pdf [file pnas.2105279118.sapp.pdf]

1

## 2 **Supplementary Information for**

### 3 **Your main manuscript title**

4 **J. Wang, M. Alipour, G. Soligo, A. Roccon, M. De Paoli, F. Picano & and A. Soldati**

5 **Alfredo Soldati.**

6 **E-mail: [alfredo.soldati@tuwien.ac.at](mailto:alfredo.soldati@tuwien.ac.at)**

### 7 **This PDF file includes:**

- 8     Supplementary text
- 9     Figs. S1 to S15 (not allowed for Brief Reports)
- 10    Tables S1 to S2 (not allowed for Brief Reports)
- 11    Legends for Movies S1 to S5
- 12    SI References

### 13 **Other supplementary materials for this manuscript include the following:**

- 14     Movies S1 to S5

## 15 Supporting Information Text

### 16 Methods: Numerical simulations

17 Numerical simulations are based on an hybrid Eulerian-Lagrangian framework. An Eulerian approach is used to describe  
 18 the gaseous phase while a Lagrangian approach is used to track the motion of the respiratory droplets. In the following, the  
 19 numerical framework, the parameters and the initial and boundary conditions adopted for the simulations will be detailed.

20 **Description of the gaseous phase.** The velocity, vapor fraction, temperature and density fields of the gaseous phase are  
 21 described using an Eulerian approach. The governing equations are solved in cylindrical coordinates in an open environment at  
 22 constant pressure  $p_0$ . Considering the larger Reynolds number that characterizes a sneezing event (with respect to a cough), a  
 23 large eddy simulation (LES) approach is employed. Although the choice of a LES approach may reduce the accuracy of the  
 24 simulations, a posteriori analysis showed that the results obtained are in excellent agreement with those obtained from direct  
 25 numerical simulations (DNS). Indeed, for the present configuration and considering the grid resolutions employed for the LES,  
 26 the regions characterized by high values of the viscous dissipation are extremely localized and their contribution to the overall  
 27 system dynamics is negligible. Under these hypothesis and after applying the Favre-weighted filtering (1) to the asymptotic  
 28 low-Mach expansion of the Navier-Stokes system, the governing equations read as follows:

$$29 \quad \frac{\partial \bar{\rho}}{\partial t} + \frac{\partial \bar{\rho} \tilde{u}_i}{\partial x_i} = \bar{S}_m, \quad [1]$$

$$31 \quad \frac{\partial \bar{\rho} \tilde{u}_i}{\partial t} + \frac{\partial \bar{\rho} \tilde{u}_i \tilde{u}_j}{\partial x_j} = -\frac{\partial \bar{p}}{\partial x_i} + \frac{\partial}{\partial x_j} \left[ (\mu_g + \mu_{sgs}) \left( \frac{\partial \tilde{u}_i}{\partial x_j} + \frac{\partial \tilde{u}_j}{\partial x_i} - \frac{2}{3} \frac{\partial \tilde{u}_i}{\partial x_i} \delta_{ij} \right) \right] + (\bar{p} - \rho_g) g_i + \bar{S}_{p,i}, \quad [2]$$

$$33 \quad \frac{\partial \bar{\rho} \tilde{Y}_v}{\partial t} + \frac{\partial \bar{\rho} \tilde{Y}_v \tilde{u}_i}{\partial x_i} = \frac{\partial}{\partial x_i} \left( \bar{\rho} (D + D_{sgs}) \frac{\partial \tilde{Y}_v}{\partial x_i} \right) + \bar{S}_m, \quad [3]$$

$$35 \quad \frac{\partial \tilde{u}_i}{\partial x_i} = \frac{\gamma - 1}{\gamma} \frac{1}{p_0} \left[ \frac{\partial}{\partial x_i} \left( (k_g + k_{sgs}) \frac{\partial \tilde{T}}{\partial x_i} \right) + \bar{S}_e - L_v \bar{S}_m \right], \quad [4]$$

$$37 \quad \tilde{T} = \frac{p_0}{\bar{\rho} R_g}, \quad [5]$$

38 where  $\bar{\rho}$ ,  $\tilde{u}_i$ ,  $\tilde{Y}_v$ ,  $\tilde{T}$ ,  $\bar{p}$  are the density, velocity, vapor mass fraction, temperature and hydrodynamic pressure fields while  $\mu_g$   
 39 is the dynamic viscosity of the gaseous phase,  $D$  the binary mass diffusion coefficient,  $k_g$  the thermal conductivity of the  
 40 vapor-air mixture and  $L_v$  the latent heat of vaporization of the liquid phase. The gaseous phase is assumed to be governed by  
 41 the equation of state where  $R_g = R/W_g$  is the gas constant of the mixture being  $W_g$  its molar mass and  $R$  the universal gas  
 42 constant. The ratio  $\gamma = c_{p,g}/c_{v,g}$  is the specific heat ratio of the carrier mixture where  $c_{p,g}$  and  $c_{v,g}$  the gaseous phase specific  
 43 heat capacity at constant pressure and volume, respectively. In the Navier-Stokes equations, the relative buoyancy force of the  
 44 jet is accounted via the term  $(\bar{p} - \rho_g) g_i$  being  $\rho_g$  the density of the ambient humid air and  $g_i$  the  $i$ -th component of the gravity  
 45 acceleration. The subgrid-scale terms of the Navier-Stokes equations are described using the classical Smagorinsky model (2):

$$46 \quad \mu_{sgs} = \bar{\rho} (C_s \Delta)^2 \left\| \frac{1}{2} \left( \frac{\partial \tilde{u}_i}{\partial x_j} + \frac{\partial \tilde{u}_j}{\partial x_i} \right) \right\|, \quad [6]$$

47 where  $C_s$  is a model constant (0.12 in our setup) and  $\Delta = [(r\Delta_\theta)\Delta_r\Delta_z]^{1/3}$  is the typical cell size. For the other subgrid-  
 48 scale fluxes,  $D_{sgs}$  and  $k_{sgs}$ , we adopt the gradient model (3) and their value are assumed proportional to the Smagorinsky  
 49 eddy-viscosity with a constant turbulent Schmidt and Prandtl numbers equal to  $Sc_t = 0.66$  and  $Pr_t = 0.78$ , respectively.

50 The effects of the dispersed phase on the gaseous phase are accounted for by three sink-source terms,  $\bar{S}_m$ ,  $\bar{S}_{p,i}$  and  $\bar{S}_e$ :

$$51 \quad \bar{S}_m = - \sum_{k=1}^{n_d} \frac{dm_k}{dt} \delta(x_i - x_{k,i}), \quad [7]$$

$$53 \quad \bar{S}_{p,i} = - \sum_{k=1}^{n_d} \frac{d}{dt} (m_k u_{k,i}) \delta(x_i - x_{k,i}), \quad [8]$$

$$55 \quad \bar{S}_e = - \sum_{k=1}^{n_d} \frac{d}{dt} (m_k c_l T_k) \delta(x_i - x_{k,i}), \quad [9]$$

56 where  $x_{k,i}$ ,  $m_k$  and  $T_k$  are  $k$ -th droplet position, mass, velocity and temperature while  $c_l$  is the liquid specific heat. The sum is  
 57 taken over the entire domain droplet population (being  $n_d$  the total number of droplets) and, the delta function expresses that  
 58 the sink-source terms act only at the domain locations occupied by the droplets. These terms are calculated in correspondence  
 59 of each grid node by volume averaging the mass, momentum, and energy sources from all droplets located within the cell  
 60 volume centered around the considered grid point.

61 **Description of the respiratory droplets.** The motion of the respiratory droplets is described using a Lagrangian approach. In  
62 particular, considering the small size of the droplets, these are treated as small rigid evaporating spheres and are approximated  
63 as point-wise particles. In addition, the temperature of the liquid phase is assumed to be uniform inside each droplet. As  
64 the volume (and mass) fraction of the fluid phase in real coughs and sneezes is relatively small (4–6), the mutual interactions  
65 among droplets (i.e collisions, coalescence of droplets) can be neglected. Besides, the effect of the subgrid-scale terms is not  
66 taken into consideration. Hence, only the resolved part of the Eulerian fields is used in the equations of the dispersed phase.  
67 With these assumptions, the position, velocity, mass and temperature of the droplets are described by the following equations:

$$\frac{dx_{k,i}}{dt} = u_{k,i}, \quad [10]$$

$$\frac{du_{k,i}}{dt} = \frac{(\tilde{u}_i - u_{k,i})}{\tau_k} (1 + 0.15 Re_k^{0.687}) + (1 - \frac{\bar{\rho}}{\rho_l}) g_i, \quad [11]$$

$$\frac{dr_k^2}{dt} = -\frac{\mu_g Sh}{\rho_l Sc} \ln(1 + B_m), \quad [12]$$

$$\frac{dT_k}{dt} = \frac{1}{3\tau_k} \left[ \frac{Nu}{Pr} \frac{c_{p,g}}{c_l} (\tilde{T} - T_k) - \frac{Sh L_v}{Sc c_l} \ln(1 + B_m) \right], \quad [13]$$

75 where  $x_{k,i}$ ,  $u_{k,i}$ ,  $r_k$  and  $T_k$  are the position, velocity, radius and temperature of the  $k$ -th droplet while  $\rho_l$  is the liquid droplet  
76 density,  $c_{p,g}$  the specific heat capacity of the gaseous phase at constant pressure and  $L_v$  the latent heat of vaporization. The  
77 droplet relaxation time,  $\tau_k$ , and the droplet Reynolds number,  $Re_k$ , are defined as:

$$\tau_k = \frac{2\rho_l r_k^2}{9\mu_g}, \quad Re_k = \frac{2\rho_l \|\tilde{u}_i - u_{k,i}\| r_k}{\mu_g}, \quad [14]$$

79 while the Schmidt number,  $Sc$ , and Prandtl number,  $Pr$ , are computed as:

$$Sc = \frac{\mu_g}{\rho_g D}, \quad Pr = \frac{\mu_g c_{p,g}}{k_g}, \quad [15]$$

81 where  $\mu_g$  and  $\rho_g$  are the dynamic viscosity and density of the gaseous phase while  $D$  is the binary mass diffusion coefficient  
82 and  $k_g$  the thermal conductivity. The Sherwood number,  $Sh$ , and Nusselt number,  $Nu$ , are estimated as a function of the  
83 droplet Reynolds number using the Frössling correlations (7):

$$Sh_0 = 2 + 0.552 Re_k^{1/2} Sc^{1/3}, \quad Nu_0 = 2 + 0.552 Re_k^{1/2} Pr^{1/3}. \quad [16]$$

85 The resulting Sherwood and Nusselt numbers are corrected to account for the Stefan flow (8, 9):

$$Sh = 2 + \frac{Sh_0 - 2}{F_m}, \quad Nu = 2 + \frac{Nu_0 - 2}{F_t}. \quad [17]$$

87 The coefficients  $F_m$  and  $F_t$  are computed as follows:

$$F_m = \frac{(1 + B_m)^{0.7}}{B_m} H_m, \quad F_t = \frac{(1 + B_t)^{0.7}}{B_t} H_t, \quad [18]$$

89 where  $H_m$  and  $H_t$  are defined as:

$$H_m = \ln(1 + B_m), \quad H_t = \ln(1 + B_t), \quad [19]$$

91 being  $B_m$  and  $B_t$  the Spalding mass and heat transfer numbers:

$$B_m = \frac{Y_{v,s} - \tilde{Y}_v}{1 - Y_{v,s}}, \quad B_t = \frac{c_{p,v}}{L_v} (\tilde{T} - T_k), \quad [20]$$

93 where  $\tilde{Y}_v$  and  $\tilde{T}$  are the vapor mass fraction and temperature fields evaluated at the droplet position,  $Y_{v,s}$  is the vapor mass  
94 fraction evaluated at droplet surface and  $c_{p,v}$  is the vapor specific heat at constant pressure. The vapor mass fraction at the  
95 droplet surface corresponds to the mass fraction of the vapor in a saturated vapor-gas mixture at the droplet temperature. To  
96 estimate  $Y_{v,s}$ , we use the Clausius-Clapeyron relation to first compute the vapor molar fraction,  $\mathcal{X}_{v,s}$ :

$$\mathcal{X}_{v,s} = \frac{p_{ref}}{p_0} \exp \left[ \frac{L_v}{R_v} \left( \frac{1}{T_{ref}} - \frac{1}{T_k} \right) \right], \quad [21]$$

98 where  $p_{ref}$  and  $T_{ref}$  are arbitrary reference pressure and temperature and  $R_v = R/W_l$  is the vapor gas constant. The saturated  
99 vapor mass fraction is then computed using the relation:

$$Y_{v,s} = \frac{\mathcal{X}_{v,s}}{\mathcal{X}_{v,s} + (1 - \mathcal{X}_{v,s}) \frac{W_g}{W_l}}, \quad [22]$$

101 where  $W_g$  and  $W_l$  are the molar mass of the gaseous and liquid phases.

102 **Numerical method.** The numerical code consists of two different modules: i) an Eulerian module that solves the governing  
 103 equations for the gaseous phase (density, velocity, vapor mass fraction and temperature); ii) a Lagrangian module that solves  
 104 the equations governing the droplet dynamics (position, velocity, mass and temperature). In particular, the governing equations  
 105 of the gaseous phase are discretized in space using a second-order central finite differences scheme and they are time advanced  
 106 using a low-storage third-order Runge-Kutta scheme. Likewise, the governing equations of the droplets are time integrated  
 107 using the same Runge-Kutta scheme, and a second-order accurate polynomial interpolation is used to evaluate the Eulerian  
 108 quantities at the droplet position. Please refer to previous works (9–11) for additional validations and tests of the numerical  
 109 method.

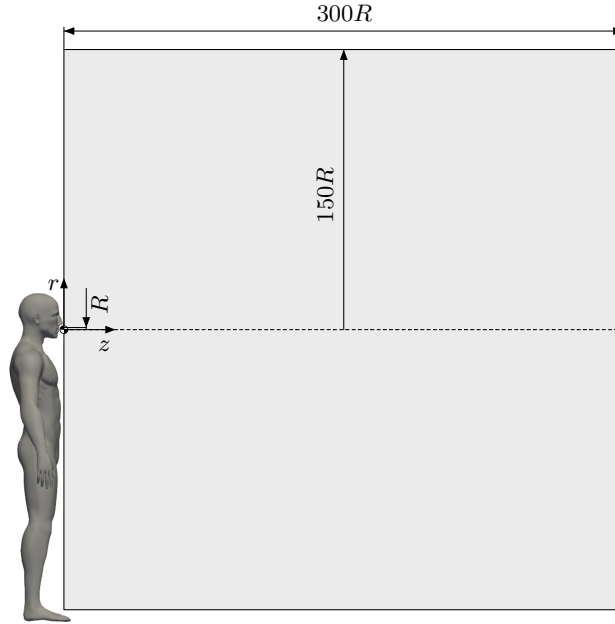

**Fig. S1.** Sketch of the simulation setup used for the simulations. The computational domain is a cylinder having dimensions  $L_\theta \times L_r \times L_z = 2\pi \times 150R \times 300R$  being  $R = 1 \text{ cm}$  the radius of the circular orifice that mimics the mouth opening. The sneezing jet, together with the respiratory droplets, are injected from the left side of the domain (through the orifice). The domain is initially quiescent (zero velocity) and characterized by a uniform value of temperature, humidity.

110 **Simulation setup.** The computational domain, figure S1, is a cylinder into which the droplet-laden sneezing jet is injected  
 111 through a circular orifice of radius  $R = 1 \text{ cm}$  located at the centre of the left base that mimics the average mouth opening for  
 112 females and males subjects (4, 12). The cylinder dimensions are  $L_\theta \times L_r \times L_z = 2\pi \times 150R \times 300R$  along the azimuthal ( $\theta$ )  
 113 radial ( $r$ ) and axial ( $z$ ) directions. The domain is discretized using a staggered grid with  $N_\theta \times N_r \times N_z = 96 \times 223 \times 1024$  grid  
 114 points. The calibration of the numerical parameters (e.g. domain size, grid resolution) is based on previous works (9, 13). In  
 115 these works, which rely on a very similar model and setup, numerical results have been benchmarked against analytic and  
 116 experimental results. In addition, further validation tests (e.g. evaporation of an isolated droplet) have been performed and  
 117 results obtained compared against analytic solutions.

118 A total mass of liquid equal to  $m_l = 8.08 \times 10^{-6} \text{ kg}$  is ejected together with the sneezing jet; the mass of the ejected gaseous  
 119 phase is equal to  $m_g = 2.00 \times 10^{-3} \text{ kg}$ . The resulting mass fraction is equal to  $\Phi_m = 4.04 \times 10^{-3}$  while the volume fraction is  
 120 equal to  $\Phi_v = 4.55 \times 10^{-6}$  conforming to previous experimental studies (4–6, 14, 15).

121 The inflow velocity profile of the sneezing jet (figure S2) is obtained from a gamma-probability-distribution function (16)  
 122 and a simple conversion from dynamic pressure to velocity is implemented based on Bernoulli's principle. The overall duration  
 123 of the injection stage (sneezing jet and droplets) is about  $0.6 \text{ s}$  (16). The sneezing jet is characterized by a temperature of  
 124  $T_j = 308 \text{ K}$  and a relative humidity  $RH_j = 90\%$  (4, 17, 18) and its peak velocity is  $u_{z,j} = 20 \text{ m/s}$  (19, 20). Although the  
 125 values of these parameters, which define the inlet/injection conditions, can sensitively influence the first stage of the sneezing  
 126 event, their effect in the latter stages of the simulations is expected to be marginal as the ambient conditions are the dominant  
 127 factors in the evaporation process. From the temperature and relative humidity of the sneezing jet, the density and vapor mass  
 128 fraction of the jet are obtained from the revised formula reported in Picard *et al.* (2008)(21). The other thermo-physical and  
 129 transport properties are estimated from Tsilingiris (2008) (22), see table S2 for details.

130 Considering now the liquid phase (respiratory droplets), for each droplet injected in the computational domain, its initial  
 131 diameter is assumed to follow a log-normal distribution with geometric mean equal to  $12 \mu\text{m}$  and geometric standard deviation  
 132 ( $GSD$ ) equal to  $0.7$  (23). Albeit being an important parameter, the droplet size distribution is expected to have a minor  
 133 influence on the final results in terms of suspension and/or deposition of the respiratory droplets, as also shown by previous  
 134 works (24), see also the section *Sensitivity of simulations to other physical parameters* for further discussion. The above

135 mentioned distribution is generated using a Gaussian random number generator based on a Ziggurat method (25). The initial  
 136 velocity of the droplets is obtained through interpolation of the velocity field of the gaseous phase in the inlet region, while  
 137 the initial temperature of the droplets is set to  $T = 308\text{ K}$ . To mimic the presence of salt, protein and virus dissolved in  
 138 the respiratory droplets (26), the droplets have a non-volatile core and thus they cannot completely evaporate. This leads  
 139 to the formation of the so-called droplet nuclei, i.e. the residual part of the respiratory droplets that does not evaporate. In  
 140 agreement with previous studies (23, 27–31), we consider that the non-volatile core of each droplet represents the 3% of the  
 141 droplet volume. In terms of droplets size, this means that a droplet can shrink down to  $\simeq 30\%$  of its initial diameter. Due to  
 142 numerical stability issues (9), all generated droplets with an initial size smaller than a critical radius of  $0.65\ \mu\text{m}$  will be treated  
 143 as tracers. Likewise, if a droplet, due to the evaporation, becomes smaller than the critical radius, it will be treated as a tracer.  
 144 The ambient is assumed quiescent (i.e. all velocity components are initially set to zero) and is characterized by a uniform  
 145 value of temperature, humidity and constant thermodynamic pressure. The density of the gaseous phase is obtained from the  
 146 gas equation of state, while the vapor mass fraction is obtained through the Clausius–Clapeyron relation using the sneezing jet  
 147 conditions as reference.

148 We perform a total of 7 simulations: a benchmark simulation used for the comparison with the experiments (case S0 in  
 149 table S2), four production simulations (cases S1-4 in table S2) and two additional simulations used to test the sensitivity of the  
 150 results (case S5-6 in table S2). The benchmark case considers mono-dispersed non-evaporating droplets (diameter of  $2\ \mu\text{m}$ )  
 151 released in a sneezing jet having the same temperature of the ambient:  $T = 295\text{ K}$  ( $22\text{ }^\circ\text{C}$ ) and humidity:  $RH = 50\%$  (TU  
 152 Wien laboratory conditions). The production simulations investigate the effects of ambient temperature and relative humidity  
 153 on the evaporation process (main results presented in the manuscript). Indeed, considering the constitutive equations of the  
 154 evaporation process, these two variables are expected to be the physical parameters with the most important effects on the  
 155 evaporation/condensation process. These simulations consider four different ambient conditions: two different temperatures,  
 156  $T = 278\text{ K}$  ( $5\text{ }^\circ\text{C}$ ) and  $T = 293\text{ K}$  ( $20\text{ }^\circ\text{C}$ ), and two relative humidity values,  $RH = 50\%$  and  $RH = 90\%$ . The latter two  
 157 simulations investigate the sensitivity of the results obtained from simulations S1-4 to two specific parameters: the occurrence  
 158 of multiple sneezing events and the initial droplet size distribution. Specifically, the first simulation considers a case in which  
 159 a second sneeze follows two seconds after the initial sneeze, while the second considers a case with a different initial size  
 160 distribution of the injected droplets, namely a Pareto distribution. For these latter cases, the ambient conditions have been  
 161 kept fixed to  $T = 293\text{ K}$  and  $RH = 50\%$ .

162 A detailed summary of the simulation parameters and thermo-physical properties adopted for the different simulations is  
 163 reported in table S1-S2.

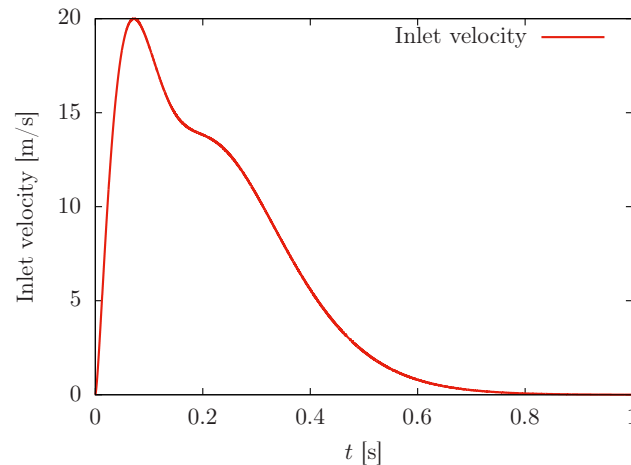

**Fig. S2.** Inflow velocity of the sneezing jet used in the simulations. The inlet velocity is obtained from a gamma-probability-distribution function (16). The duration of the sneezing event is  $\simeq 0.6\text{ s}$  and the peak velocity is  $20\text{ m/s}$ .

**Table S1. Summary of the simulation parameters and thermophysical properties.**

| Parameter                                                 | Symbol     | Value                 | Unit of measurement   |
|-----------------------------------------------------------|------------|-----------------------|-----------------------|
| Inlet radius                                              | $R$        | $1.00 \times 10^{-2}$ | m                     |
| Sneezing jet temperature                                  | $T_j$      | 308                   | K                     |
| Sneezing jet relative humidity                            | $RH_j$     | 90%                   | -                     |
| Maximum sneezing jet velocity                             | $u_{z,j}$  | 20                    | m/s                   |
| Droplets temperature                                      | $T_k$      | 308                   | K                     |
| Mass injected liquid phase                                | $m_l$      | $8.08 \times 10^{-6}$ | kg                    |
| Mass injected gaseous phase                               | $m_g$      | $2.00 \times 10^{-3}$ | kg                    |
| Liquid mass fraction                                      | $\Phi_m$   | $4.04 \times 10^{-3}$ | -                     |
| Liquid volume fraction                                    | $\Phi_v$   | $4.55 \times 10^{-6}$ | -                     |
| Environment temperature                                   | $T$        | 278 and 293           | K                     |
| Environment relative humidity                             | $RH$       | 50% and 90%           | -                     |
| Environment thermodynamic pressure                        | $p_0$      | $1.01 \times 10^5$    | Pa                    |
| Dynamic viscosity gaseous phase                           | $\mu_g$    | $1.99 \times 10^{-5}$ | Pa s                  |
| Thermal conductivity gaseous phase                        | $k_g$      | $2.63 \times 10^{-2}$ | W/(m <sup>2</sup> K)  |
| Latent heat of vaporization                               | $L_v$      | $2.41 \times 10^6$    | J/kg                  |
| Universal gas constant                                    | $R$        | $2.87 \times 10^2$    | J/(kg <sup>2</sup> K) |
| Molar mass of the gaseous phase                           | $W_g$      | $2.89 \times 10^{-2}$ | kg/mol                |
| Gas constant gaseous phase                                | $R_g$      | $2.92 \times 10^2$    | J/(kg <sup>2</sup> K) |
| Specific heat capacity at constant pressure gaseous phase | $c_{p,g}$  | $1.03 \times 10^3$    | J/(kg <sup>2</sup> K) |
| Specific heat capacity at constant volume gaseous phase   | $c_{v,g}$  | $7.42 \times 10^2$    | J/(kg <sup>2</sup> K) |
| Specific heat ratio gaseous phase                         | $\gamma$   | 1.39                  | -                     |
| Vapor specific heat capacity at constant pressure         | $c_{p,v}$  | $1.88 \times 10^3$    | J/(kg <sup>2</sup> K) |
| Vapor phase gas constant                                  | $R_v$      | $4.61 \times 10^2$    | J/(kg <sup>2</sup> K) |
| Binary mass diffusion coefficient                         | $D$        | $2.67 \times 10^{-5}$ | m <sup>2</sup> /s     |
| Molar mass liquid phase                                   | $W_l$      | $1.80 \times 10^{-2}$ | kg/mol                |
| Density liquid phase                                      | $\rho_l$   | $1.00 \times 10^3$    | kg/m <sup>3</sup>     |
| Specific heat liquid phase                                | $c_l$      | $4.18 \times 10^3$    | J/(kg <sup>2</sup> K) |
| Volume fraction non-volatile material droplet             | $\Phi_v^c$ | 3%                    | -                     |
| Prandtl number                                            | $Pr$       | 0.782                 | -                     |
| Schmidt number                                            | $Sc$       | 0.663                 | -                     |

**Table S2. Summary of the main simulation parameters**

| Case | Temperature<br>$T$ [K] | Relative humidity<br>$RH$ [%] | Density<br>$\rho_g$ [kg/m <sup>3</sup> ] | Vapor mass fraction<br>$Y_g$ [ | Sneezing events | Size distribution |
|------|------------------------|-------------------------------|------------------------------------------|--------------------------------|-----------------|-------------------|
| S0   | 295                    | 50                            | 1.174                                    | $8.22 \times 10^{-3}$          | Single          | Monodispersed     |
| S1   | 278                    | 50                            | 1.245                                    | $2.82 \times 10^{-3}$          | Single          | Log-normal        |
| S2   | 278                    | 90                            | 1.245                                    | $5.09 \times 10^{-3}$          | Single          | Log-normal        |
| S3   | 293                    | 50                            | 1.181                                    | $7.42 \times 10^{-3}$          | Single          | Log-normal        |
| S4   | 293                    | 90                            | 1.181                                    | $1.34 \times 10^{-2}$          | Single          | Log-normal        |
| S5   | 293                    | 50                            | 1.181                                    | $7.42 \times 10^{-3}$          | Double          | Log-normal        |
| S6   | 293                    | 50                            | 1.181                                    | $7.42 \times 10^{-3}$          | Single          | Pareto            |

164 **Methods: Experiments**

165 We set up a laboratory experiment to investigate the dynamics of droplets-laden jets. We used a compressor-based system to  
 166 supply the flow with air, which is seeded with micrometric droplets by a liquid seeder. Measurements consist of flow velocity  
 167 (point wise) and drops distribution (two-dimensional distribution). Details are provided in the following.

168 **Experimental setup.** The main components of the system are shown in figure S3(a). To produce repeatable flow conditions, we  
 169 designed a system in which the flow parameters (pressure, duration) can be carefully controlled. The flow generated by the  
 170 compressor (pressure 6.5 bar) is controlled by an electromagnetic valve (Parker 4818653D D5L F). The valve is activated by  
 171 a timer (Finder, relays type 94.02 and plug-in timer 85.02), which is set to maintain the valve open for 0.15 s. We verified  
 172 *a-posteriori* via hot-wire measurements that the flow is highly repeatable.

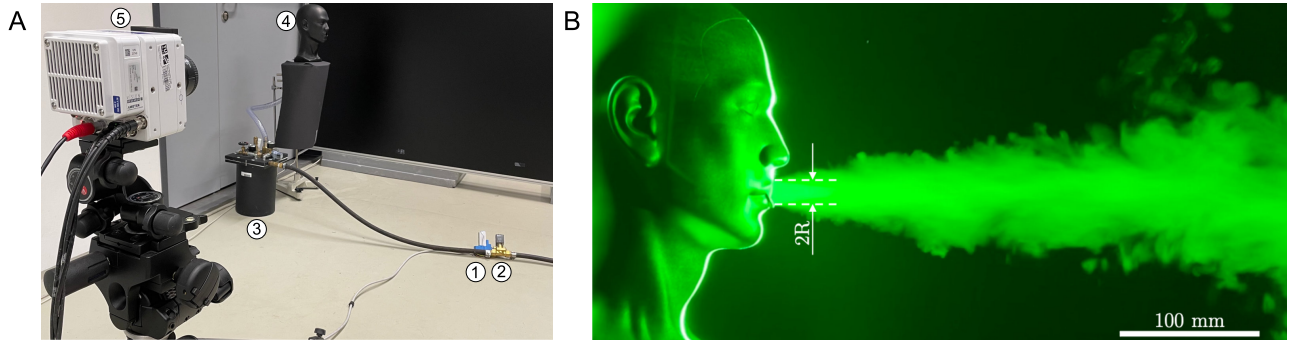

**Fig. S3.** Panel A shows the experimental setup used. The setup is composed by the compressor (not shown), timer (1), electromagnetic valve (2), liquid seeder (3) and dummy head (4). A laser is used to illuminate the micro-metric droplets. Image acquisition is performed by a high-speed camera (5). Panel B shows the dummy head used to perform the experiments ( $R = 1\text{ cm}$ ).

173 The compressor is connected to a seeding generator (9010F0031 Liquid Seeder, type FT700CE), which produces droplet  
 174 with size falling in the range  $1\text{--}3\ \mu\text{m}$ , with an average droplets size of  $2\ \mu\text{m}$ , as reported in figure S4. To seed the flow with  
 175 neutrally-buoyant and non-evaporating drops, an aqueous and non-toxic solution (Safex - Inside Nebelfluid, Dantec Dynamics)  
 176 is used. The solution is kept at the ambient temperature. We observed that the drops remain suspended in the ambient for  
 177 long time, without any apparent effect of sedimentation. The droplets Stokes number,  $St$ , is defined as  $St = \rho_l r_l^2 \bar{u}_{z,j} / (R \mu_g)$ ,  
 178 being  $r_l = 1\ \mu\text{m}$  averaged droplets radius and  $\bar{u}_{z,j} \leq 20\text{ m/s}$  the reference velocity. For the present case, we obtain  $St \leq 0.1$   
 179 and we consider the droplets as flow tracers (32).

180 We used a dummy head to avoid exposure of human beings to the potentially harmful laser light. The droplet-laden jet is  
 181 emitted through the mouth of the dummy, which is mimicked by a circular opening of radius  $R = 1\text{ cm}$ , see figure S3(B). The  
 182 mouth is directly connected to the fog generator through a tube of length  $100\text{ cm}$  and inner diameter  $2R$ . The temperature of  
 183 environment ( $T$ ), jet ( $T_j$ ) and droplets ( $T_k$ ) is constant and equal to  $T = T_j = T_k = 295\text{ K}$ , therefore buoyancy plays no role in  
 184 the dynamics of the jet, in agreement with the observations of (33). The relative humidity of the air is  $RH = 50\%$ .

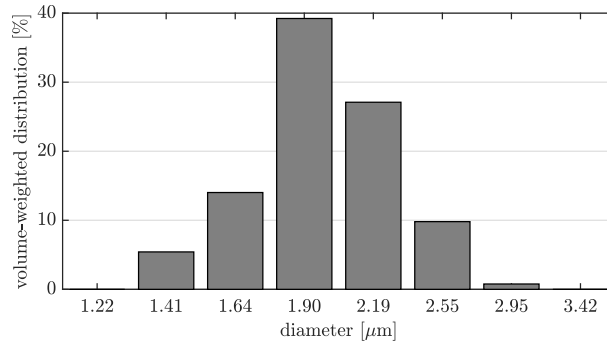

**Fig. S4.** Volume-weighted droplets distribution [%] as a function of the diameter of the droplets produced (34).

185 **Imaging system.** A high-speed laser is used to create a sheet (thickness  $4\text{ mm}$ ) in which the experimental measurements are  
 186 performed. The laser consists of a double-pulse laser (Litron LD60-532 PIV, 25 mJ per pulse) illuminating the measurement  
 187 region at frequency  $0.8\text{ kHz}$ . To record the evolution of the flow, we used a Phantom VEO 340L (sensor size of  $2560 \times 1600$  pixel  
 188 at  $0.8\text{ kHz}$ ) equipped with lenses having focal length  $35\text{ mm}$ , looking perpendicularly to the laser sheet at a distance of  $200\text{ cm}$ .  
 189 Camera and laser are controlled via a high-speed synchroniser (PTU X, LaVision GmbH, Germany). Images are collected with  
 190 DAVIS 10 (LaVision GmbH, Germany) and processed in MATLAB to compute the extension of the front of the jet.



191 As the jet propagates along the axial direction ( $z$ ), particles concentration reduces. As a result, the light intensity recorded  
 192 by the cameras drops significantly with  $z$ , making the detection of the front of the jet hard to obtain. To perform the  
 193 edge-detection process, we applied subsequent image processing steps (subtracting background noise, binarization, median  
 194 filter). After image preprocessing, the boundary of the jet is found by Moore-Neighbor tracing algorithm (35) and finally the  
 195 edge, the maximum horizontal coordinate of the boundary, is determined and tracked in time. In figure S5 (and as well in the  
 196 manuscript), the evolution of the front of the jet,  $L$ , is reported as a function of time. The mean (red solid line) and standard  
 197 deviation (error bars) are obtained from 7 independent experiments.

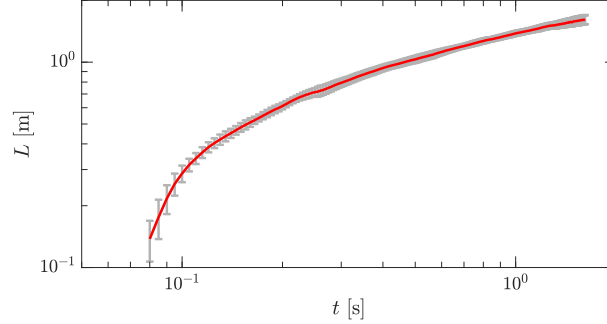

**Fig. S5.** Evolution of the front of the jet,  $L$ , as a function of time,  $t$ . Mean (red solid line) and standard deviation (error bars) are obtained from 7 independent experiments. The acquisition rate is 0.8 kHz and we show here one every 4 instants.

198 **Hot-wire anemometry.** We used a hot-wire anemometry system (acquisition rate 1 kHz, probe type Dantec 55P11) to measure  
 199 the axial velocity of the flow and thus to calibrate the inflow velocity profile. Figure S6 shows the axial velocity measured  
 200 along the centerline of the jet ( $r = 0$ ) at a distance  $z = 20$  mm from the mouth as a function of time,  $t$ . To characterise the  
 201 inlet condition, we performed 11 independent experiments. In each experiment, the instantaneous velocity measurements ( $u_1$ ,  
 202 grey data) are averaged over a moving window of 20 ms to obtain  $u_{20}$  (blue solid line). Then results of all experiments are  
 203 averaged to obtain the ensemble averaged flow velocity ( $u$ , red solid line). The excellent agreement observed between the  
 204 ensemble average ( $u$ ) and the single experiment ( $u_{20}$ ) confirms the repeatability of the flow generated. Finally, the mean value  
 205 of velocity computed for  $0 \leq t \leq 0.7$  s ( $\bar{u}$ , dashed line) is also shown, and it is used for further comparison with the results  
 206 obtained from the numerical simulations.

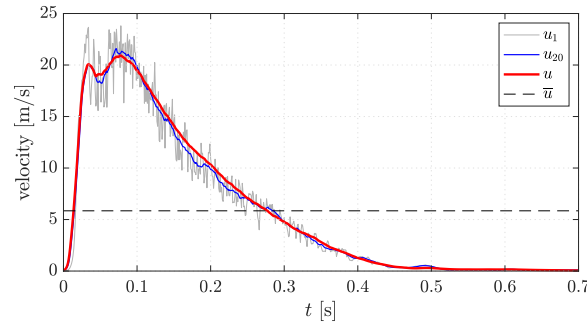

**Fig. S6.** Time-dependent evolution of the axial velocity measured at the centerline ( $r = 0$ ) at distance  $z = 20$  mm from the mouth. Instantaneous velocity measurements ( $u_1$ , grey line) as well as the velocity averaged over a moving window of 20 ms ( $u_{20}$ , blue line) are shown here for one experiment. Then results of 11 experiments are used to obtain the ensemble averaged flow velocity ( $u$ , red solid line). Finally, the mean value computed for  $0 \leq t \leq 0.7$  s is shown ( $\bar{u}$ , dashed line).

## 207 Comparison between simulations and experiments

208 We provide here a quantitative comparison of the experimental and numerical results obtained. The results are analyzed in  
 209 terms of jet properties in time (distance travelled by the jet) and in space (average jet velocity at different positions). We  
 210 compute the best-fitting exponent and the corresponding least-squares power-law fit for the two phases of the sneezing event  
 211 (i.e. jet and puff). Finally, we compare numerical and experimental measurements of the jet velocity at increasing distance  
 212 from the inlet.

213 We consider first the initial growth of the jet ( $t < 0.6$  s), in which the momentum flux is constant. Indeed, for  $t > 0.6$  s  
 214 the flow-rate at the inlet is negligible, see figure S6. As a result, the expected jet growth obtained using the self-similarity  
 215 hypothesis (36) is  $L \sim t^{1/2}$ . Assuming that the initial stage is defined for  $0 \leq t \leq 0.6$  s and fitting the results within this time  
 216 interval, we obtain that the least-squares power-law fits are (with 95% confidence bounds):

- 217 •  $L(t) = (1.51 \pm 0.03) \times t^{0.51 \pm 0.02}$ , with root mean squared error of RMSE = 0.03 for the experiments.
- 218 •  $L(t) = (1.38 \pm 0.04) \times t^{0.51 \pm 0.03}$ , with root mean squared error of RMSE = 0.05 for the numerical simulations.

219 The resulting exponents of the power-law scalings obtained numerically and experimentally are in excellent agreement, and  
 220 match also the theoretical (self-similar) predictions, as shown in figure S7.

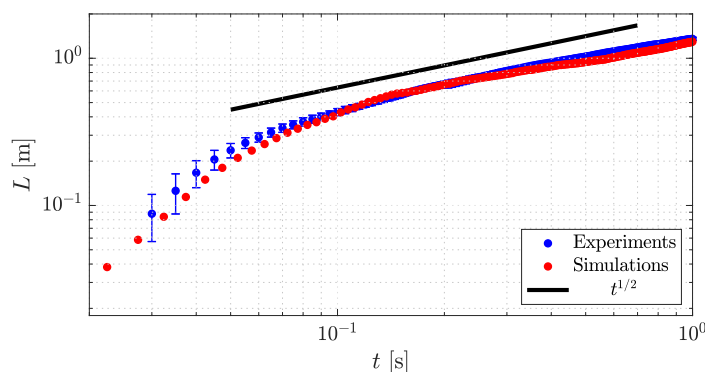

**Fig. S7.** Distance travelled by the front of the jet in the early-stage of the process (first second of the simulation). Results obtained experimentally (symbols, blue) and numerically (symbols, red) are in excellent agreement with the theoretical (self-similar) predictions ( $t^{1/2}$ , black solid line).

221 We consider now the asymptotic scaling exponent ( $t > 0.6$  s). During this phase, the flow behaves like a puff and is  
 222 characterized by constant momentum. The penetration distance, obtained again using the hypothesis of self-similarity (36),  
 223 evolves as  $L \sim t^{1/4}$ . Since this phase is longer than the jet phase, we can provide an accurate quantification of the scaling  
 224 exponent for  $t > 0.6$  s. In particular, assuming that  $L \sim t^n$ , the scaling exponent can be estimated by examining the local  
 225 slopes,  $\frac{d \log(L/R)}{d \log(t/T_0)}$ . We use the inlet radius  $R = 0.01$  m to make the penetration distance dimensionless. Similarly, we use  
 226  $T_0 = R/u_{z,j}$  to rescale the time, with  $u_{z,j} = 20$  m/s the maximum sneezing jet velocity. Please note that the quantities used  
 227 to make the variables dimensionless do not have any effect on the estimate of the scaling exponent. Results of experiments and  
 228 simulation (symbols) are shown in figure S8 and suggest that, also in this phase, the self-similar solution is attained for long  
 229 times ( $L \sim t^{1/4}$ , dashed line).

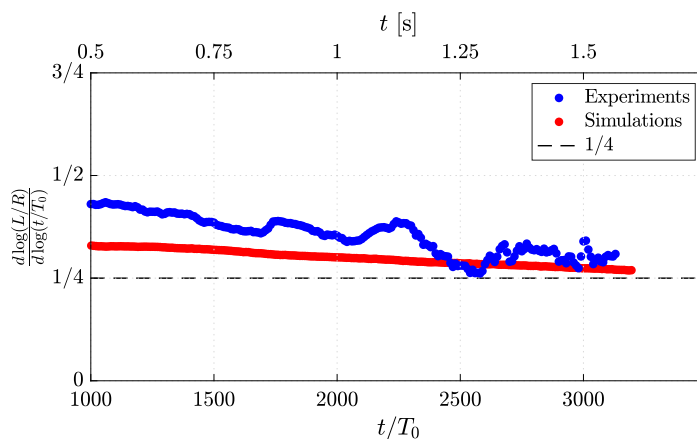

**Fig. S8.** Evolution in time of the scaling exponent, evaluated by the local slope,  $\frac{d \log(L/R)}{d \log(t/T_0)}$  in the late stages of the simulations. We use the inlet radius  $R$  to make the penetration distance dimensionless, and  $T_0 = R/u_{z,j}$  to rescale the time, being  $u_{z,j}$  the maximum sneezing jet velocity. Results of experiments (0.1 s moving average, blue dots) and simulations (red dots) indicate that, for long times, the self-similar solution ( $L \sim t^{1/4}$ , dashed line) is attained.

230 Finally, to further benchmark experimental results against numerical results, we also investigate the evolution of the  
 231 time-averaged jet velocity,  $\bar{u}$ , along the axial direction ( $z$  axis). The time interval used for the average spans from  $t = 0$  s up to  
 232  $t = 0.6$  s. Concerning the experiments, 76 independent realizations are used to determine  $\bar{u}(z)$ , which is defined as described  
 233 above. Measurements are performed along the centerline at 76 equally-spaced  $z$  positions. For simulations, data are obtained  
 234 from the Eulerian grid used to compute the velocity fields and then averaged in time. Results are shown in figure S9 for  
 235 simulations (red dots) and experiments (blue dots). The velocity profiles are reported normalized by  $\bar{u}_0$ , i.e. the first velocity  
 236 value (closest point to the inlet position). The scaling law,  $\bar{u} \propto 1/x$ , is also reported as a reference (37) with a black, dashed  
 237 line. As can be appreciated from the figure, experiments and simulations are in excellent agreement over the entire axis span.  
 238 In addition, both experimental and numerical results well match with the analytic scaling law.

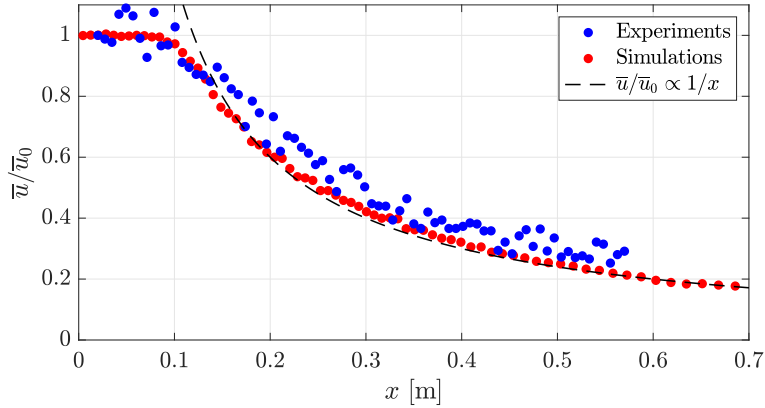

**Fig. S9.** Time-averaged axial velocity,  $\bar{u}$ , measured at the jet centerline and normalised by the velocity at the closet point to the inlet position ( $\bar{u}_0$ ), is reported as a function of the distance from the mouth,  $z$ . Experimental results are represented using blue dots while simulations results with red dots. As a reference, the scaling law  $\bar{u}/\bar{u}_0 \propto 1/x$  (dashed, black line) is also reported.

239 **Sensitivity of simulations to other physical parameters**

240 We present here the results obtained from simulations S5-6. These simulations have been used to assess the sensitivity of the  
 241 results obtained from simulations S1-4 to two additional factors: the occurrence of multiple sneezing event and the initial  
 242 droplet size distribution.

243 **Multiple sneezing events.** We start by discussing the sensitivity of the results to multiple sneezing events analyzing the results  
 244 obtained from simulation S5. This simulation considers a second sneeze that occurs two seconds after the initial sneeze. First,  
 we analyze the resulting evaporation times of the droplets, which are shown in figure S10.

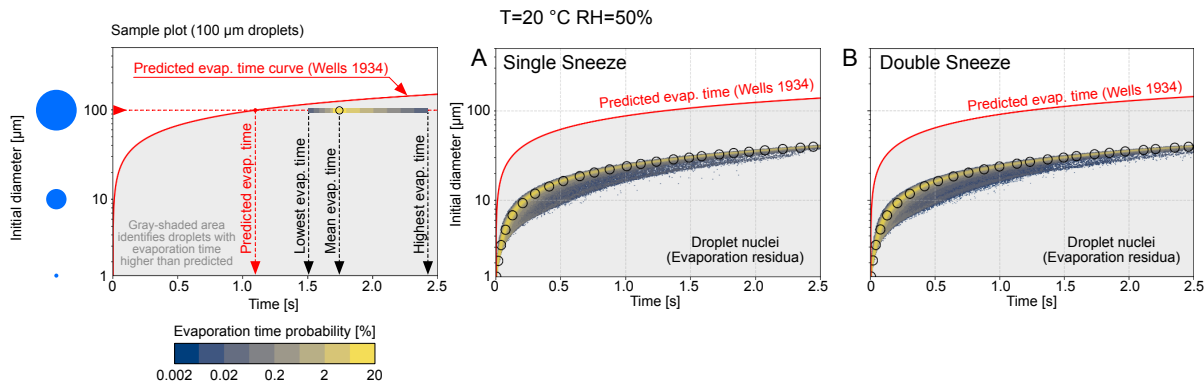

**Fig. S10.** Distribution of droplets evaporation times for a single sneeze (A) and a double sneeze (B). For any initial diameter, the leftmost side of the distribution indicates the shortest evaporation time, while the rightmost side of the distribution marks the longest evaporation time. Color identifies the probability (blue-low; yellow-high) of having a certain evaporation time. Empty black dots represent the mean evaporation time. The predicted evaporation ( $d^2$ -law) is reported with a solid red line.

245  
 246 Panel (A) refers to a single sneeze while panel (B) to a double sneeze. For both cases, the evaporation time is calculated  
 247 starting from the time at which the droplet is injected in the domain up to the time when the dry nuclei size is reached (i.e.  
 248 considering the droplet flight time). We observe how the distribution of the evaporation times obtained from the two cases are  
 249 almost identical. We can thus infer that the first sneeze does not influence the evaporation times of the droplets released during  
 250 the second sneeze. This behavior can be traced back to the motion of the droplets. Indeed, most droplets are characterized by  
 251 a small diameter (less than 100 microns) and, as a consequence, their velocity is similar to that of the gaseous phase they are  
 252 entrained in. Therefore, these droplets are unlikely to sample the conditions of the turbulent gas cloud of moist air released  
 253 during the first sneeze (located much farther in space and already partially mixed with the ambient air), but instead, they will  
 254 sample the thermodynamics conditions of the turbulent gas cloud generated by the second sneeze.

Second, we evaluate the dispersion of the droplets analyzing the resulting exposure maps, figure S11.

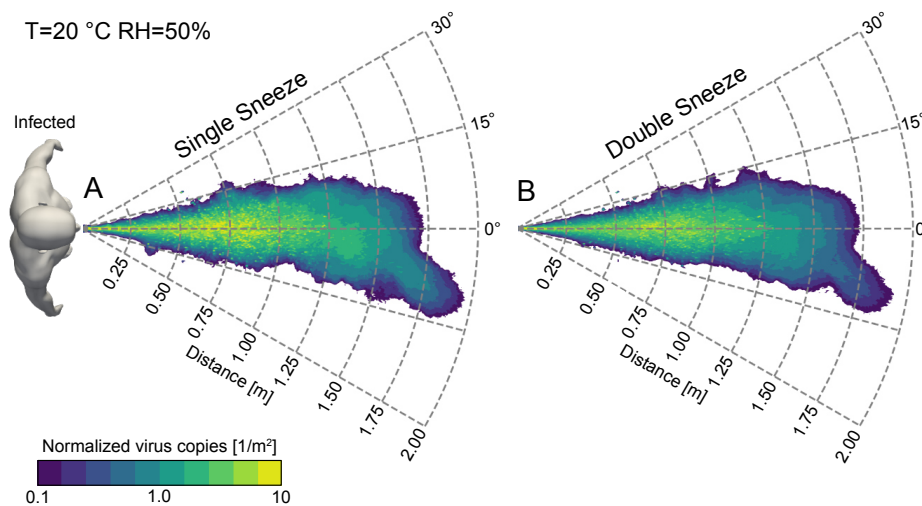

**Fig. S11.** Virus exposure maps obtained considering a single sneezing event (A) and multiple sneezing events (B). Results are shown normalized by the total number of virus copies ejected during the single sneeze (A) or the two sneezes (B). Results refer to  $T = 20^\circ C$  and  $RH = 50\%$ .

256 As in the manuscript, exposure maps are computed counting the cumulative number of virus copies that go past a control  
 257 area in different locations of the domain; data for the exposure maps is collected over a time interval of 4 seconds for both cases.  
 258 These maps are then normalized dividing by the total number of virions ejected (double for this new case considered). Similar  
 259 dispersion and spreading in the forward horizontal direction are observed between the single sneeze and the double sneeze case,  
 260 indicating indeed that the presence on a cloud of warm and moist air emitted during the first sneeze does not particularly  
 261 affect the evolution of the second sneeze and the dispersion of the droplets emitted. Thus, similarly to the evaporation times,  
 262 also the virus exposure maps are not significantly influenced by the second sneezing event. Please note that since the results  
 263 are normalized by the total number of virus copies ejected, for the same value of exposure the dimensional concentration of  
 264 virus copies is double when a sequence of two sneezes is considered.

265 **Initial droplet size distribution.** We move now to discuss the results obtained from simulation S6. This simulation considers the  
 266 case in which the size of the injected droplets follows a Pareto distribution. We start by analyzing the resulting evaporation  
 times of the droplets, which are reported in figure S12.

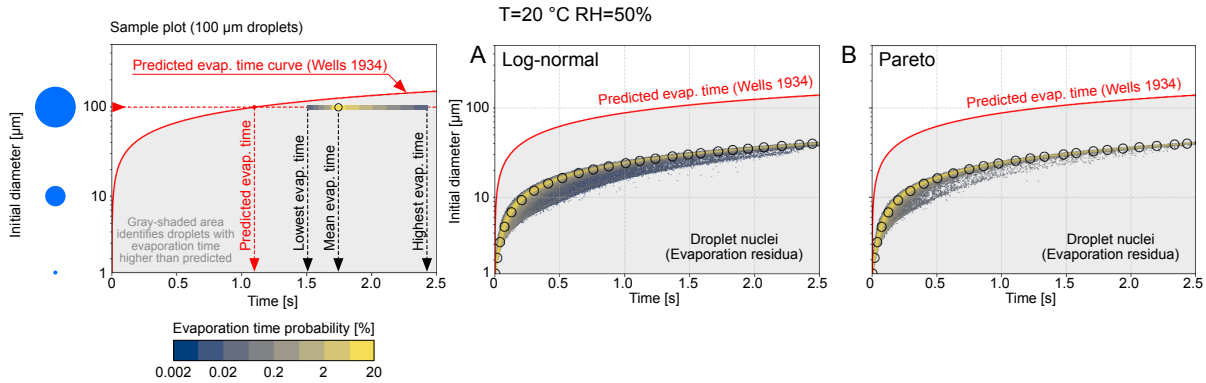

**Fig. S12.** Distribution of droplets evaporation times when a log-normal (A) and a Pareto (B) distribution are used. For any initial diameter, the leftmost side of the distribution indicates the shortest evaporation time, while the rightmost side of the distribution marks the longest evaporation time. Color identifies the probability (blue-low; yellow-high) of having a certain evaporation time. Empty black dots represent the mean evaporation time.  $d^2$ -law predictions are reported with a solid red line.

267 Looking at the plots, we can observe how the two resulting distributions are very similar. Being the initial size distribution  
 268 different, marginal difference can be noticed in the number of samples present in the different diameter classes. Overall, this  
 269 indicates that the evaporation times are not significantly influenced by the prescribed initial size distribution. This behavior  
 270 can be somehow expected as we are in a dilute regime (low volume fractions).  
 271 We move now to the virus exposure maps, which are shown in figure S13.

272

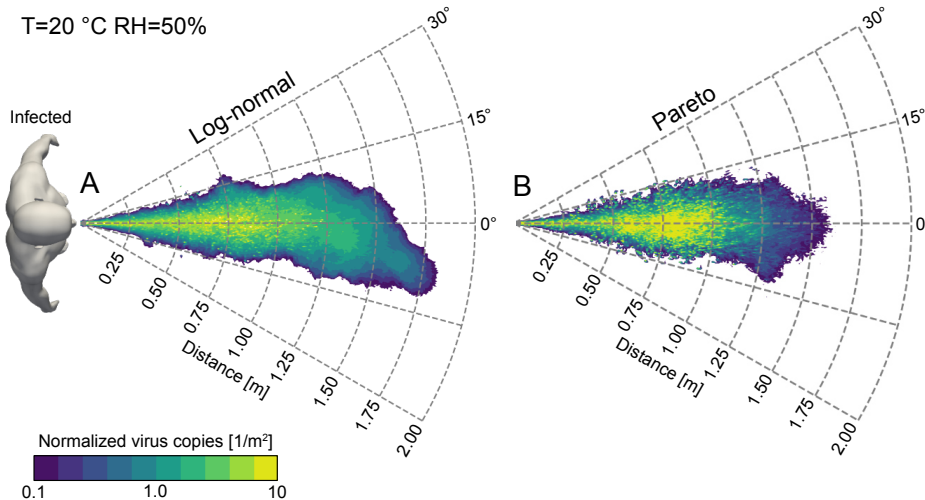

**Fig. S13.** Virus exposure maps obtained assuming a log-normal distribution (A) and a Pareto distribution (B). Results are shown normalized by the total number of virus copies ejected during the single sneeze (almost the same for both cases). Both simulations consider  $T = 20^\circ C$  and  $RH = 50\%$ .

273 Panel A refers to the simulation performed using a log-normal distribution (as in the manuscript), while panel B refers to  
 274 the simulation performed using a Pareto distribution. We can observe that the general picture offered by the exposure map is

275 similar and for both cases there is a core region characterized by a high-level of virus exposure surrounded by an outer region  
276 characterized by a lower level of virus exposure. As well, the extension (and thus the dispersion pattern) of the respiratory  
277 droplets is similar and for both cases the front of the jet reaches the distance of about 1.65 *m*. Some differences can be noticed  
278 in the transitions between the different levels of virus exposure, which are smoother when a log-normal distribution is used.  
279 These difference can be traced back to the lower number of 10 to 15  $\mu m$  droplets present in the simulation that uses a Pareto  
280 distribution. As the liquid mass ejected is the same for both cases, the lack of smaller droplets in the Pareto distribution  
281 simulation is balanced out by the presence of larger droplets, which generate hotspots of viral load (and consequently a higher  
282 local exposure value), and thus a noisier exposure map.

## 283 Effect of face covering

284 With the aim of briefly discussing the effect of face covering, we performed a series of additional experiments in which different  
285 types of protecting devices are adopted. We use advanced imaging techniques to qualitatively evaluate the action of protective  
286 devices against droplets spread. In particular, we examine qualitatively the capability of protective devices to prevent the  
287 possibility of host-to-host direct contagion. By direct contagion we mean here the exposure to the direct emission of droplets  
288 ejected from the mouth or to the droplets carried by the puff propelled forward by the emitter during normal breathing,  
289 coughing, sneezing, talking etc. (23). The following configurations have been considered:

- 290 • No face-covering device;
- 291 • Surgical mask Level I/Type I, conforming to norm ASTM F2100 for US, to EN 14683 for EU and YY-0469 for China  
292 (figure S14A);
- 293 • Respirator mask N95/FFP2/KN95, conforming to norm NIOSH 42 for US, to EN 149 for EU and GB2626 for China  
294 (figure S14B);
- 295 • Face shield, conforming to EN 166 for EU (figure S14C).

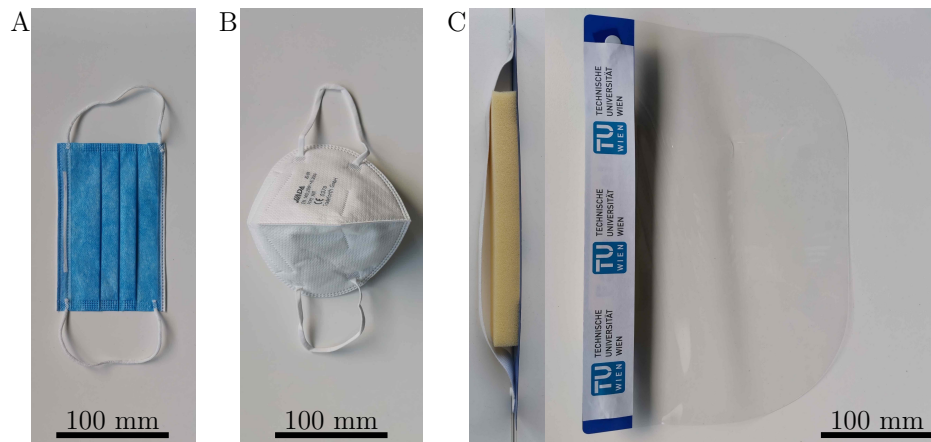

Fig. S14. Face covering devices tested: surgical mask level I/Type I (A), respirator mask N95/FFP2/KN95 (B) and face shield (C, top and front view).

296 In these experiments, the inlet velocity condition is the same described in figure S6. We show in figure S15 the light intensity  
297 distribution recorded using different types of face covering devices. The color indicates the light intensity recorded, from low  
298 (white) to high (black) values. The amount of light scattered by the airborne drops and recorded by the cameras is proportional  
299 to the local number of drops. Therefore, on a qualitative basis, the light intensity distribution corresponds to the concentration  
300 distribution of droplets. The instant considered is the same for all cases shown and corresponds to time  $t = 0.15$  s, being  $t = 0$   
301 the instant at which the flow starts. One comparative movie (Movie S5) representing the time-dependent evolution of the  
302 flow in all configurations considered is also available in the electronic supplementary material. Although these visualizations  
303 represent just a qualitative picture of the distribution of droplets emitted, it is possible to analyze the effect of protective  
304 devices on the spread of the droplets. We observe in figure S15(B-D) that for all devices considered and in the time window  
305 investigated, the advection-diffusion process of the droplets in the horizontal forward direction is decreased with respect to the  
306 case without protective devices, shown in figure S15(A). Moreover, we also note that the breathing puffs are mainly evacuated  
307 from the venting located at the gaps between the protective devices rims and the face of the dummy. For the face shield, puffs  
308 are mainly evacuated downward (i.e. towards the neck of the dummy), whereas for surgical and respiratory masks, a much  
309 reduced flow-rate of puffs is evacuated downward/backward towards the neck of the dummy. However, the numbers of droplets  
310 emitted from the upper rim (i.e. in the nasal bridge area) is much larger than the number of droplets emitted towards the neck.  
311 Eventually the droplets carried by the rising plume are observed to slowly propagate few centimeters in forward direction.  
312 From our qualitative analysis, we observe that the action produced by protective devices against droplets spread is effective  
313 to prevent host-to-host direct contagion. However, to provide detailed and quantitative information about the impact of the  
314 devices on the amount of droplets suspended, further analysis are required. Please also refer to recent works (38, 39) for a  
315 detailed discussion on face-covering devices.

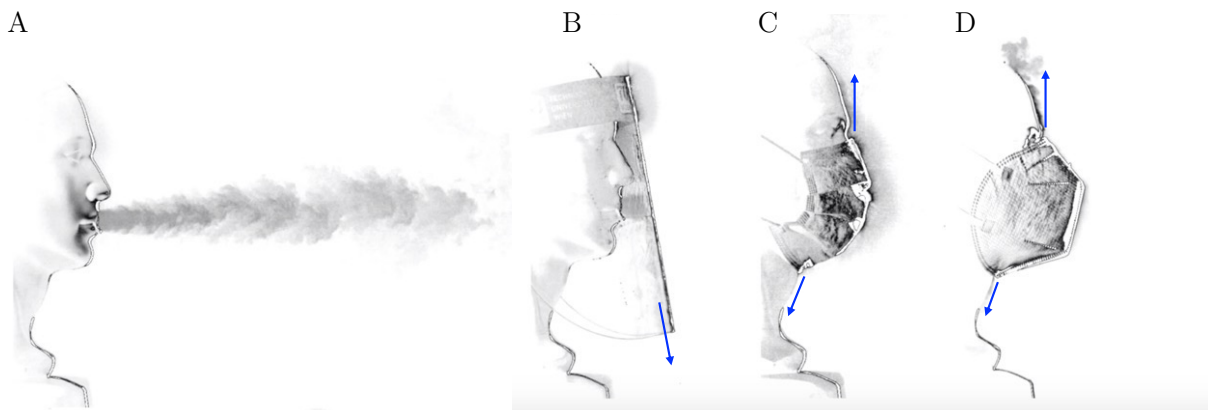

**Fig. S15.** Comparison of the effect of different type of face covering. “Still” frame taken at  $t = 0.15$  s from Movie S5. Experimental measurements are reported in four flow configurations: no face-covering device (A), surgical mask level I/Type I (B), respirator mask N95/FFP2/KN95 (C) and face shield (D). The color indicates the light intensity recorded, from low (white) to high (black) values. On a qualitative basis, the light intensity distribution corresponds to the concentration distribution of droplets. In the configurations considered and in the time window investigated, the advection-diffusion process of the droplets in horizontal forward direction is decreased with respect to the case without protective devices. The breathing puffs are mainly evacuated from the venting occurring at the gaps between the protective devices rims and the face of the dummy.



316 **Movie S1.** Movie showing the first 3 seconds of a sneezing event for  $T = 5\text{ }^{\circ}\text{C}$  and  $RH = 50\%$ . The background  
317 shows the local value of the relative humidity (black-low; white-high). The respiratory droplets are displayed  
318 rescaled according to their diameter (not in real scale) and are also colored according to their size (red-small;  
319 white-large). From the movie, the presence of localized supersaturated regions where  $RH > 100\%$  (white) can  
320 be appreciated. The upward motion of the sneeze cloud produced by buoyancy and, of part of the respiratory  
321 droplets, can be also appreciated.

322 **Movie S2.** Movie showing the first 3 seconds of a sneezing event for  $T = 5\text{ }^{\circ}\text{C}$  and  $RH = 90\%$ . The background  
323 shows the local value of the relative humidity (black-low; white-high). The respiratory droplets are displayed  
324 rescaled according to their diameter (not in real scale) and are also colored according to their size (red-small;  
325 white-large). For this setting (low temperature and high relative humidity), large supersaturated regions  
326 ( $RH > 100\%$ ) can be observed. Droplets present in these regions, due to the local humidity conditions, can  
327 possibly grow in size (condensation) instead of shrinking.

328 **Movie S3.** Movie showing the first 3 seconds of a sneezing event for  $T = 20\text{ }^{\circ}\text{C}$  and  $RH = 50\%$ . The background  
329 shows the local value of the relative humidity (black-low; white-high). The respiratory droplets are displayed  
330 rescaled according to their diameter (not in real scale) and are also colored according to their size (red-small;  
331 white-large). For this configuration (moderate temperature and low humidity), supersaturated regions are  
332 only observed in the beginning of the sneezing event. Nevertheless, most of the droplets are located in regions  
333 with a local relative humidity value larger than the ambient. Thus their evaporation dynamics is much slower  
334 than predicted by analytic models (e.g.  $d^2$ -law).

335 **Movie S4.** Movie showing the first 3 seconds of a sneezing event for  $T = 20\text{ }^{\circ}\text{C}$  and  $RH = 90\%$ . The background  
336 shows the local value of the relative humidity (black-low; white-high). The respiratory droplets are displayed  
337 rescaled according to their diameter (not in real scale) and are also colored according to their size (red-small;  
338 white-large). Also for this setting, the larger temperature (with respect to  $T = 5\text{ }^{\circ}\text{C}$ ) limits the extension of  
339 the supersaturated regions even though the ambient humidity is close to the saturation value.

340 **Movie S5.** Movie showing a comparison of the effect of different type of face covering. The evolution  
341 of the flow for  $0 \leq t \leq 1\text{ s}$  of a sneezing event is considered. Experimental measurements are reported in  
342 four flow configurations: no face-covering device (A), surgical mask level I/Type I (B), respirator mask  
343 N95/FFP2/KN95 (C) and face shield (D). The colour indicates the light intensity recorded, from low (black)  
344 to high (white) values. On a qualitative basis, the light intensity distribution corresponds to the concentration  
345 distribution of droplets. In the configurations considered and in the time window investigated, the advection-  
346 diffusion process of the droplets in horizontal forward direction is considerably decreased with respect to the  
347 case without protective devices. The breathing puffs are mainly evacuated from the venting occurring at the  
348 gaps between the protective devices rims and the face of the dummy.

## 349 References

- 350 1. Favre A (1983) Turbulence: Space-time statistical properties and behavior in supersonic flows. *Phys. Fluids* 26(10):2851.
- 351 2. Smagorinsky J (1963) General circulation experiments with the primitive equations. the basic experiment. *Mon. Wea.*  
352 *Rev.* 91(3):99–164.
- 353 3. Schmidt H, Schumann U (1989) Coherent structure of the convective boundary layer derived from large-eddy simulations.  
354 *J. Fluid Mech.* 200:511–562.
- 355 4. Bourouiba L, Dehandschoewercker E, Bush JW (2014) Violent expiratory events: on coughing and sneezing. *J. Fluid*  
356 *Mech.* 745:537–563.
- 357 5. Johnson G, et al. (2011) Modality of human expired aerosol size distributions. *J. Aerosol Sci.* 42(12):839–851.
- 358 6. Duguid JP (1946) The size and the duration of air-carriage of respiratory droplets and droplet-nuclei. *J. Hyg.* 44(6):471–479.
- 359 7. Froessling N (1968) On the evaporation of falling drops, Technical report.
- 360 8. Abramzon B, Sirignano W (1989) Droplet vaporization model for spray combustion calculations. *Int. J. Heat Mass Transf.*  
361 32(9):1605–1618.
- 362 9. Dalla Barba F, Picano F (2018) Clustering and entrainment effects on the evaporation of dilute droplets in a turbulent jet.  
363 *Phys. Rev. Fluids* 3(3).
- 364 10. Picano F, Battista F, Troiani G, Casciola CM (2011) Dynamics of PIV seeding particles in turbulent premixed flames.  
365 *Exp. Fluids* 50(1):75–88.
- 366 11. Rocco G, Battista F, Picano F, Troiani G, Casciola CM (2015) Curvature effects in turbulent premixed flames of  $h_2$ /air:  
367 A dns study with reduced chemistry. *Flow Turbul. Combust.* 94(2):359–379.
- 368 12. Gupta JK, Lin CH, Chen Q (2009) Flow dynamics and characterization of a cough. *Indoor air* 19(6):517–525.
- 369 13. Wang J, Dalla Barba F, Picano F (2021) Direct numerical simulation of an evaporating turbulent diluted jet-spray at  
370 moderate reynolds number. *Int. J. Multiph. Flow* 137:103567.

- 371 14. Dbouk T, Drikakis D (2020) On coughing and airborne droplet transmission to humans. *Phys. Fluids* 32(5):053310.
- 372 15. Dbouk T, Drikakis D (2020) On respiratory droplets and face masks. *Phys. Fluids* 32(6):063303.
- 373 16. Busco G, Yang S, Seo J, Hassan Y (2020) Sneezing and asymptomatic virus transmission. *Phys. Fluids* 32(7):073309.
- 374 17. Ferron G, Haider B, Kreyling W (1988) Inhalation of salt aerosol particles—i. estimation of the temperature and relative  
375 humidity of the air in the human upper airways. *J. Aerosol Sci.* 19(3):343–363.
- 376 18. Morawska L, et al. (2009) Size distribution and sites of origin of droplets expelled from the human respiratory tract during  
377 expiratory activities. *J. Aerosol Sci.* 40(3):256–269.
- 378 19. Xie X, Li Y, Chwang A, Ho P, Seto W (2007) How far droplets can move in indoor environments-revisiting the wells  
379 evaporation-falling curve. *Indoor air* 17(3):211–225.
- 380 20. Bourouiba L (2020) Turbulent gas clouds and respiratory pathogen emissions: potential implications for reducing  
381 transmission of COVID-19. *JAMA* 323(18):1837–1838.
- 382 21. Picard A, Davis RS, Gläser M, Fujii K (2008) Revised formula for the density of moist air (cipm-2007). *Metrologia*  
383 45(2):149–155.
- 384 22. Tsilingiris P (2008) Thermophysical and transport properties of humid air at temperature range between 0 and 100°C.  
385 *Energy Convers. Manag.* 49(5):1098–1110.
- 386 23. Balachandar S, Zaleski S, Soldati A, Ahmadi G, Bourouiba L (2020) Host-to-host airborne transmission as a multiphase  
387 flow problem for science-based social distance guidelines. *Int. J. Multiph. Flow* p. 103439.
- 388 24. Rosti ME, Olivieri S, Cavaiola M, Seminara A, Mazzino A (2020) Fluid dynamics of COVID-19 airborne infection suggests  
389 urgent data for a scientific design of social distancing. *Sci. Rep.* 10:22426.
- 390 25. Marsaglia G, Tsang W (2000) The ziggurat method for generating random variables. *J. Stat. Softw.* 005(i08).
- 391 26. Vejerano EP, Marr LC (2018) Physico-chemical characteristics of evaporating respiratory fluid droplets. *J. R. Soc. Interface*  
392 15(139):20170939.
- 393 27. Chaudhuri S, Basu S, Kabi P, Unni VR, Saha A (2020) Modeling the role of respiratory droplets in Covid-19 type  
394 pandemics. *Phys. Fluids* 063309:1–12.
- 395 28. de Oliveira P, Mesquita L, Gkantonas S, Giusti A, Mastorakos E (2020) Evolution of spray and aerosol from respiratory  
396 releases: theoretical estimates for insight on viral transmission. *medRxiv*.
- 397 29. Smith SH, et al. (2020) Aerosol persistence in relation to possible transmission of SARS-CoV-2. *Phys. Fluids* 32(10):107108.
- 398 30. Redrow J, Mao S, Celik I, Posada JA, Feng Z (2011) Modeling the evaporation and dispersion of airborne sputum droplets  
399 expelled from a human cough. *Build. Environ.* 46(10):2042–2051.
- 400 31. Stadnytskyi V, Bax CE, Bax A, Anfinrud P (2020) The airborne lifetime of small speech droplets and their potential  
401 importance in SARS-CoV-2 transmission. *Proc. Natl. Acad. Sci. USA* 117(22):11875–11877.
- 402 32. Tropea C, Yarin AL (2007) *Springer handbook of experimental fluid mechanics*. (Springer Science & Business Media).
- 403 33. Yang F, Pahlavan AA, Mendez S, Abkarian M, Stone HA (2020) Towards improved social distancing guidelines: Space  
404 and time dependence of virus transmission from speech-driven aerosol transport between two individuals. *Phys. Rev.*  
405 *Fluids* 5(12):122501.
- 406 34. Dantec Dynamics (2009) *Seeding Generator for LDA and PIV*.
- 407 35. Gonzalez RC, Eddins SL, Woods RE (2004) *Digital image publishing using MATLAB*. (Prentice Hall).
- 408 36. Sangras R, Kwon O, Faeth G (2002) Self-preserving properties of unsteady round nonbuoyant turbulent starting jets and  
409 puffs in still fluids. *J. Heat Transfer* 124(3):460–469.
- 410 37. Xu C, Nielsen PV, Gong G, Liu L, Jensen RL (2015) Measuring the exhaled breath of a manikin and human subjects.  
411 *Indoor Air* 25(2):188–197.
- 412 38. Cheng Y, et al. (2021) Face masks effectively limit the probability of SARS-CoV-2 transmission. *Science*.
- 413 39. Bagheri G, Thiede B, Hejazi B, Schlenczek O, Bodenschatz E (2021) Face-masks save us from SARS-CoV-2 transmission.  
414 *arXiv preprint 2106.00375*.
